# Supplementary material for: Factor VIII Is Synthesized in Human Endothelial Cells, Packaged in Weibel-Palade Bodies and Secreted Bound to ULVWF Strings
Source: PubMed Central journal article supplement (PMC4608722; doi:10.1371/journal.pone.0140740), 2015-10-16
Supplement: pone.0140740.s014.pdf [file pone.0140740.s014.pdf]

**S2 Table. Alexa Fluor (AF)-labeled secondary antibodies**

| <b>Alexa Fluor (AF)-labeled secondary antibodies</b>    | <b>Catalogue #</b> |
|---------------------------------------------------------|--------------------|
| Chicken anti-rabbit IgG AF-488                          | A21441             |
| Chicken anti-rabbit IgG AF-647                          | A21443             |
| Goat anti-mouse F(ab') <sub>2</sub> fragment-IgG AF-647 | A21237             |
| Goat anti-mouse IgM AF-488                              | A20142             |
| Donkey anti-mouse IgG AF-488                            | A21202             |
| Chicken anti-goat IgG AF-647                            | A21469             |

The AF-labeled fluorescent secondary antibodies were supplied at 2 mg/ml and were used at a final concentration of 20 µg/ml in 1% BSA/PBS (Life Technologies).
