# Supplementary material for: Factor VIII Is Synthesized in Human Endothelial Cells, Packaged in Weibel-Palade Bodies and Secreted Bound to ULVWF Strings
Source: PubMed Central journal article supplement (PMC4608722; doi:10.1371/journal.pone.0140740), 2015-10-16
Supplement: pone.0140740.s015.pdf [file pone.0140740.s015.pdf]

**S3 Table. Threshold cycle numbers for each cell type**

|             | Real-time PCR Threshold Cycle (C <sub>T</sub> ) |              |              |              |
|-------------|-------------------------------------------------|--------------|--------------|--------------|
|             | <i>GAPDH</i>                                    | <i>F8</i>    | <i>VWF</i>   | <i>AVPR2</i> |
| GMVECs      | 17.37 ± 0.12                                    | 33.04 ± 0.14 | 21.02 ± 0.19 | 36.85 ± 0.91 |
| HUVECs      | 16.20 ± 0.11                                    | 31.32 ± 0.11 | 20.60 ± 0.18 | 37.66 ± 0.66 |
| Fibroblasts | 16.95 ± 0.10                                    | 30.24 ± 0.09 | 34.61 ± 0.48 | 34.88 ± 0.32 |

Average number of PCR cycles ± standard deviation to reach the threshold fluorescent signal detection in real-time PCR using TaqMan probes. Data are from 4-7 separate RNA isolations from each cell type. Threshold cycle numbers are means from 3-7 PCR analyses with triplicate measurements within each PCR experiment.
