# Supplementary material for: Factor VIII Is Synthesized in Human Endothelial Cells, Packaged in Weibel-Palade Bodies and Secreted Bound to ULVWF Strings
Source: PubMed Central journal article supplement (PMC4608722; doi:10.1371/journal.pone.0140740), 2015-10-16
Supplement: pone.0140740.s017.pdf [file pone.0140740.s017.pdf]

**S5 Table. Fluorescent intensities of fibroblasts stained with secondary detection antibodies with and without primary antibodies to VWF**

| <b>Rabbit anti-VWF + Chicken anti-rabbit IgG-488</b> |                 |                |
|------------------------------------------------------|-----------------|----------------|
|                                                      | Total Intensity | Mean Intensity |
|                                                      | 1.33 ( $10^8$ ) | 377            |
| <b>Secondary Chicken anti-rabbit IgG-488</b>         |                 |                |
|                                                      | Total Intensity | Mean Intensity |
|                                                      | 2.28 ( $10^8$ ) | 647            |
| <b>Rabbit anti-VWF + Chicken anti-rabbit IgG-647</b> |                 |                |
|                                                      | Total Intensity | Mean Intensity |
|                                                      | 5.85 ( $10^7$ ) | 166            |
| <b>Secondary Chicken anti-rabbit IgG-647</b>         |                 |                |
|                                                      | Total Intensity | Mean Intensity |
|                                                      | 5.23 ( $10^7$ ) | 149            |

Fluorescent intensities were measured in fibroblasts internally stained separately with rabbit anti-VWF plus two different secondary detection antibodies or with these secondary detection antibodies alone. Staining with secondary chicken anti-rabbit IgG-488 resulted in higher fluorescent intensities than rabbit anti-VWF + chicken anti-rabbit IgG-488.
